# Supplementary material for: G1-4A, a Polysaccharide from Tinospora cordifolia Inhibits the Survival of Mycobacterium tuberculosis by Modulating Host Immune Responses in TLR4 Dependent Manner
Source: PLoS One. 2016 May 5;11(5):e0154725. doi: 10.1371/journal.pone.0154725 (PMC4858241; doi:10.1371/journal.pone.0154725)
Supplement: S1 Fig — (DOC) [file pone.0154725.s001.doc]

**Supporting Information**

**S1 Fig. Effect of G1-4A on MTB growth in Middlebrook broth by Resazurin microtiter plate assay (REMA).**

Resazurin microtiter plate assay (REMA) was performed to evaluate the effect of G1-4A on MTB growth in Middlebrook 7H9 broth supplemented with ADC. Briefly, dilutions of G1-4A (62.5µg/ml-1000µg/ml) were prepared in 7H9 broth and dispensed in sterile 96 well plates. Isoniazid was taken as positive control. Inoculums of 104 MTB cells were added to each well. Sterile water was filled to periphery wells to minimize evaporation. The plate was sealed with paraffin, and incubated a 37°C for one week. Resazurin solution (30 µl/well) was added to each well and incubated overnight. A change in color from blue to pink indicated the growth of bacteria.Data shown here are from a single representative experiment out of three independent experiments.
